# Supplementary material for: Use of Aureobasidium pullulans xylanase for simultaneous saccharification and fermentation in second- generation bioethanol production
Source: Research Square preprint supplement (doi:10.21203/rs.3.rs-8022214/v1), 2025-11-19
Supplement: Supplementary file 1 [file 63e4162d3fbbec8a3da85be8.docx]

**Supplementary material**

**Use of *Aureobasidium pullulans* xylanase for simultaneous saccharification and fermentation in second-generation bioethanol production**

Carla A. Lara1, 2,3,4, Evelyn S. Oliveira2, Susana Marques1, Francisco Gírio1, Giordana D. Arend5, César Fonseca1, Carlos A. Rosa3

1 Laboratório Nacional de Energia e Geologia, I.P., Unidade de Bioenergia, Estrada do Paço do Lumiar 22, 1649-038, Lisboa, Portugal

2Departamento de Alimentos, Faculdade de Farmácia, Universidade Federal de Minas Gerais, Belo Horizonte, Minas Gerais, 31270-901 Brazil

3Departamento de Microbiologia, ICB, C.P. 486, Universidade Federal de Minas Gerais, Belo Horizonte, Minas Gerais, 31270-901, Brazil

4UNIFAVENI Centro Universitário FAVENI, Rua do Rosário, 313 - Vila Camargos - Guarulhos – São Paulo - CEP 07111-080, Brazil

5Departamento de Engenharia Química e Engenharia de Alimentos, Universidade Federal de Santa Catarina, Florianópolis, 88040-970, Brazil

*Corresponding authors:

E-mail: Carlos A. Rosa: carlrosa@icb.ufmg.br; César Fonseca: cesfo@novonesis.com

**Fig S1a**


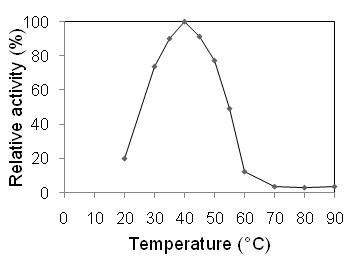


**Fig S1b**


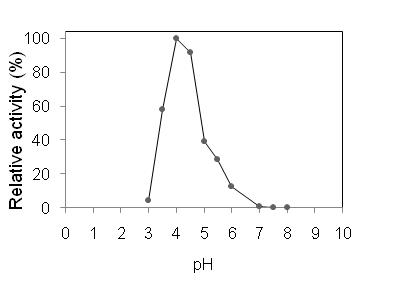


**Figure S1.** Xylanase activity profile at different temperatures (**A**) and pH (**B**) of the *A. pullulans* UFMG-CM-Y518 extracellular extractafter 48 h induction in xylan containing medium. The determination of the temperature was carried out at pH 5.5, and pH determination was done at 40 °C.

**Fig S2**


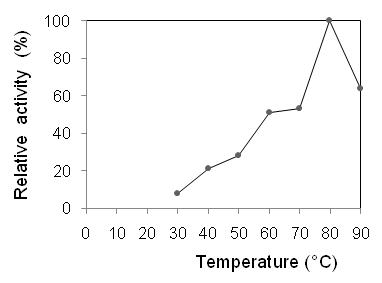


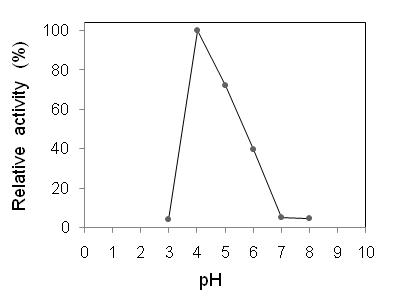


**Figure S2.**Beta-xylosidase activity profile of extracellular extract of *A. pullulans*UFMG-CM-Y518at different temperatures (**A**) and pH (**B**) after 48 h induction in xylan containing medium. The temperature assay was performed at pH 5.5, and the pH assaywas done at 70 °C.

Fig. S3

S3a


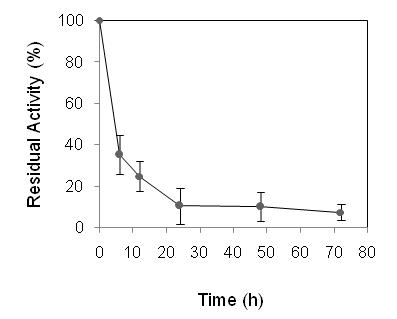


S3b


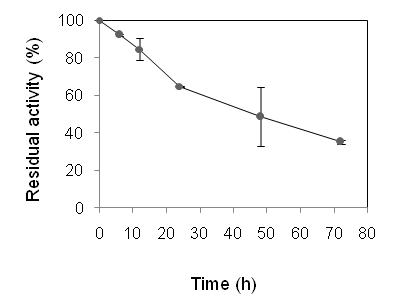


**Figure S3.** Stability of xylanase activity in extracellular extracts of *Aureobasidium pullulans*UFMG-CM-Y518, incubated for 72 h at 45 °C, pH 4.8 using acetate buffer in the absence (**A**) or presence of xylan as the substrate (**B**).

Fig. S4


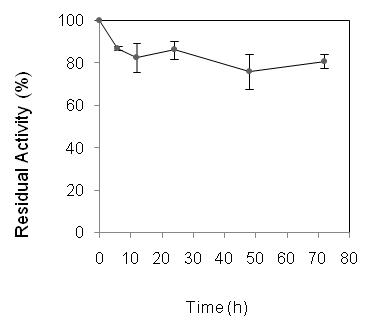


**Figure S4.**Stability of β-xylosidase activity in extracellular extracts of *Aureobasidium pullulans*UFMG-CM-Y518, incubated for 72 h at 45 °C, pH 4.8 using acetate buffer.

Fig. S5


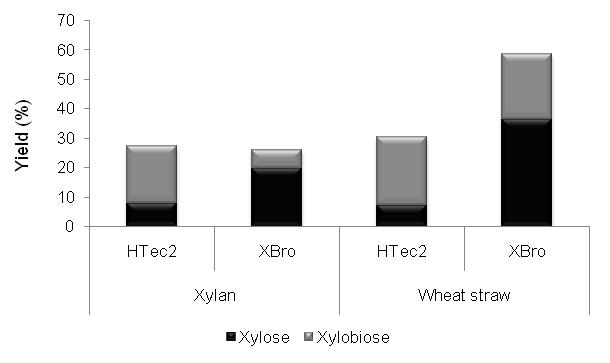


**Figure S5.** Yield of xylose and xylobiose from Cellic HTec2 and *Aureobasidium pullulans*UFMG-CM-Y518 (XBro) extract at 200 U g-1 (xylan) in the enzymatic hydrolysis of the xylan fraction at 50 °C, pH 5.5 using commercial xylan [2% (w/v)] and pretreated wheat straw [10% (w/v) total solids].

Fig S6A


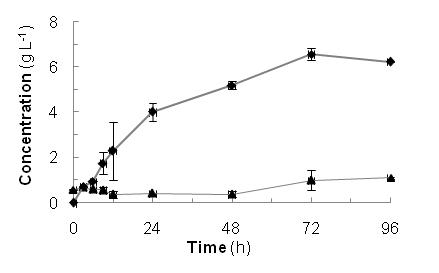


Fig S6B

**Figure S6.** Ethanol production by *Spathaspora passalidarum*UFMG-CM-Y469at 35 °C and 150 rpm under anaerobic conditions. (**A**) SSF process from beechwood xylan (30 g L-1) using the extracellular extract of *A. pullulans*UFMG-CM-Y518(XBro). (**B**) Commercial D-xylose fermentation (30 g L-1) supplemented with extracellular extract from *Aureobasidium pullulans*UFMG-CM-Y518(XBro) [concentrations of D-xylose (-▲-) and ethanol (-◆-)].

Fig. S7


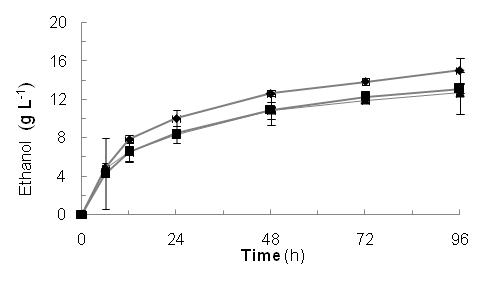


**Figure S7**. Ethanol production by SSF with *S.cerevisiae* Ethanol Red at 35 °C and 150 rpm under anaerobic conditions from wheat straw cellulose fraction by application of cellulase Cellic CTec2 [(-▲-) without supplementation; (-◆-) supplemented with Cellic HTec2; (-■-) supplemented with *A. pullulans*UFMG-CM-Y518 extract].
